# Supplementary material
Source: PubMed Central journal article supplement (PMC4219323)
Supplement: NIHMS611280-supplement-01.pdf [file NIHMS611280-supplement-01.pdf]

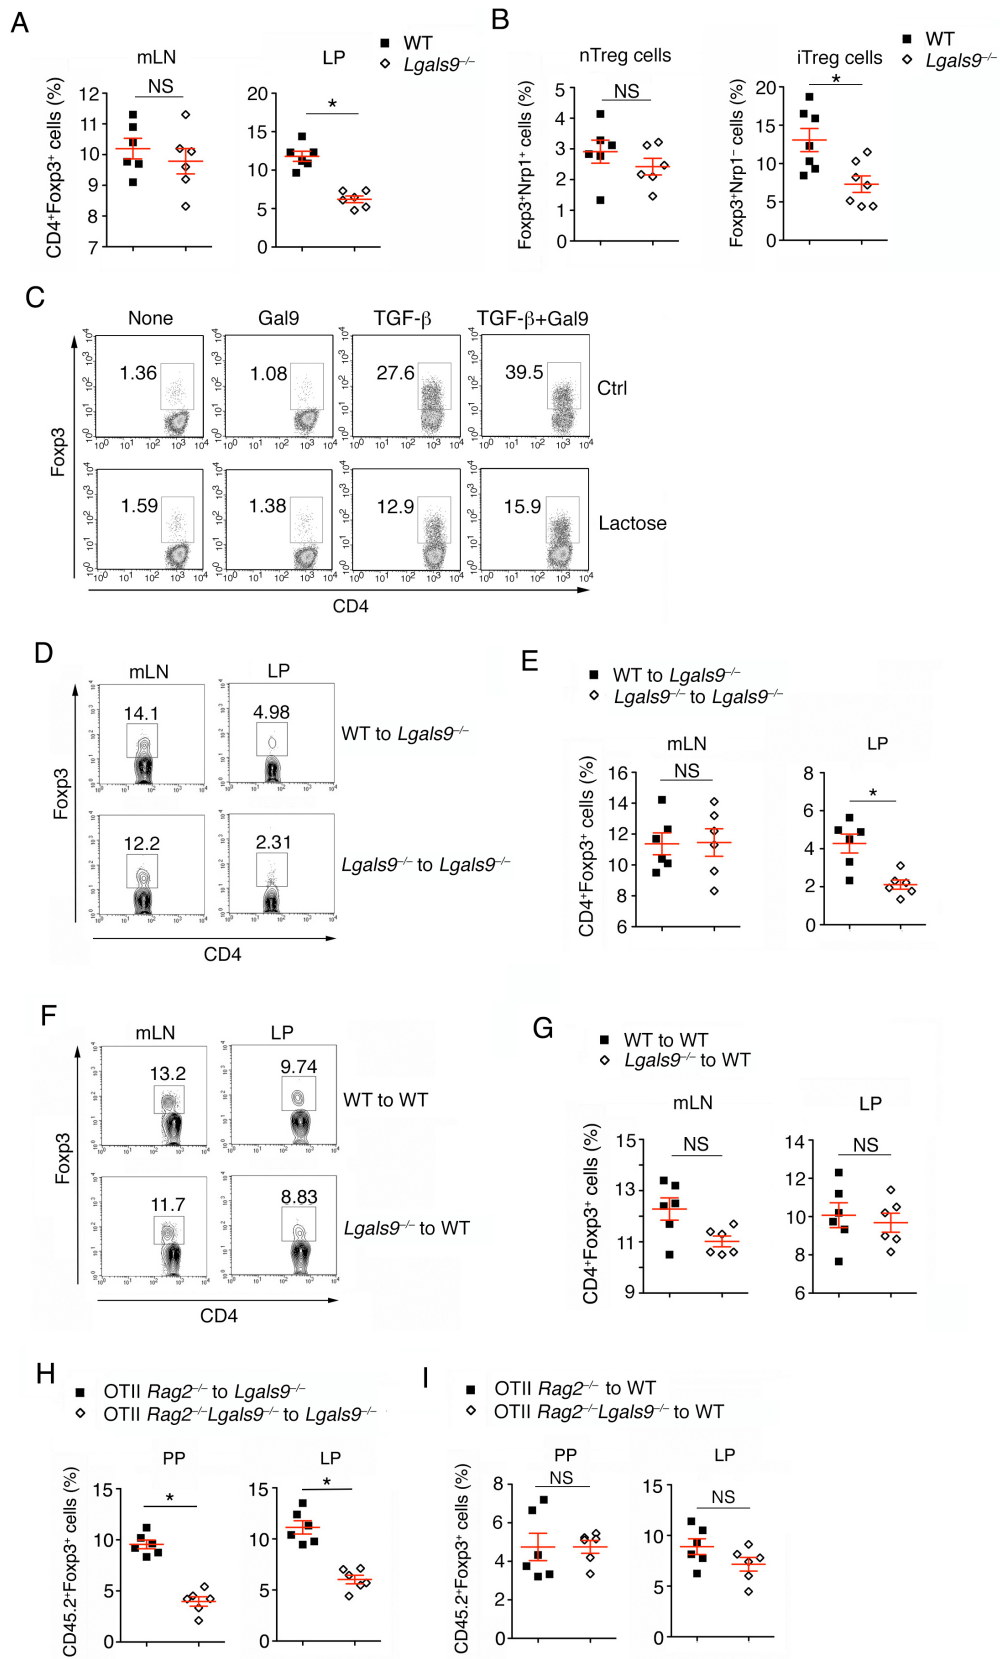

**Figure S1, related to Figure 1.** (A) Quantification of the frequency of Foxp3<sup>+</sup> Treg cells within indicated organs as in **Figure 1A**; (B) Quantification of frequency of Foxp3<sup>+</sup>Nrp1<sup>lo</sup> iTreg cells or Foxp3<sup>+</sup>Nrp1<sup>hi</sup> nTreg cells as in **Figure 1B**; (C) Activated WT naïve CD4<sup>+</sup> T cells were stimulated with combinations of TGF-β and recombinant galectin-9 with or without β-lactose (100mM) for 3 days. The frequency of Foxp3<sup>+</sup> cells was determined by flow cytometry; Chimeric mice were generated by transferring WT or *Lgals9*<sup>-/-</sup> BM into (D-E) *Lgals9*<sup>-/-</sup> or (F-G) WT host mice. 10 weeks after reconstitution, the percentage of CD4<sup>+</sup>Foxp3<sup>+</sup> Treg cells in mLN and LP was determined by flow cytometry and quantification; (H-I) Quantification of the frequency of CD45.2<sup>+</sup>CD4<sup>+</sup>Foxp3<sup>+</sup> iTreg cells in PP and LP of recipient mice as in **Figure 1F** and **Figure 1G**. Data are representative of three independent experiments with n ≥ 4 mice each group. \**P* < 0.05 (Student's *t*-test, error bars, SD).

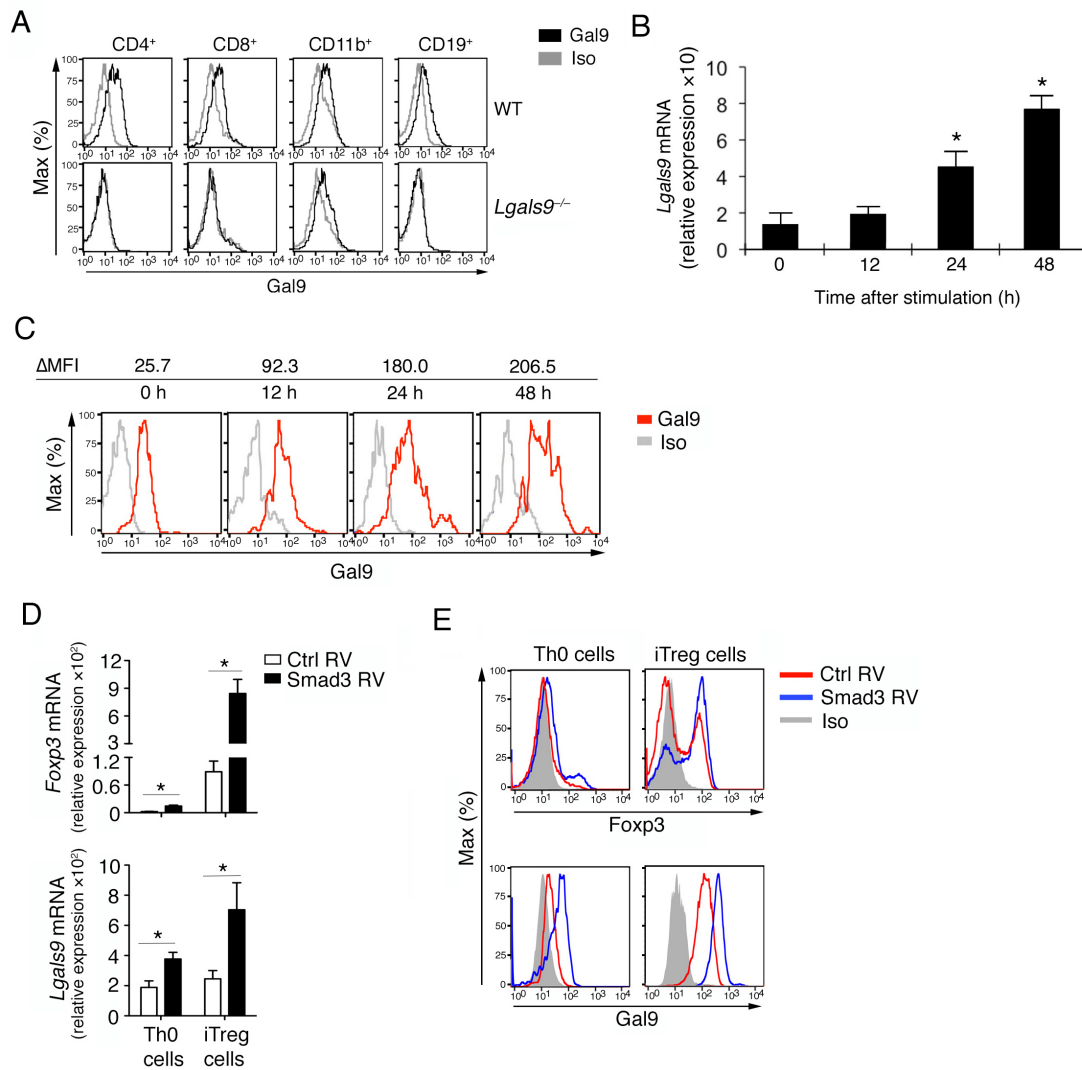

**Figure S2, related to Figure 2.** (A) Protein expression level of galectin-9 was determined in CD4<sup>+</sup>, CD8<sup>+</sup> T cells, CD11b<sup>+</sup> macrophages, and CD19<sup>+</sup> B cells by flow cytometry; (B) Quantitative real-time PCR analysis of the time course of the expression of *Lgals9* mRNA in iTreg cells; (C) Time course of galectin-9 protein expression in iTreg cells was determined by flow cytometry; (D) mRNA and (E) protein expression levels of Foxp3 and galectin-9 in naive CD4<sup>+</sup> T cells transduced with retrovirus expressing control vector (MIG) or Smad3-expressing vector and differentiated into Th0 or iTreg cells; Data

are representative of two independent experiments with  $n \geq 5$  mice each group.  $*P < 0.05$   
(Student's *t*-test, error bars, SD).

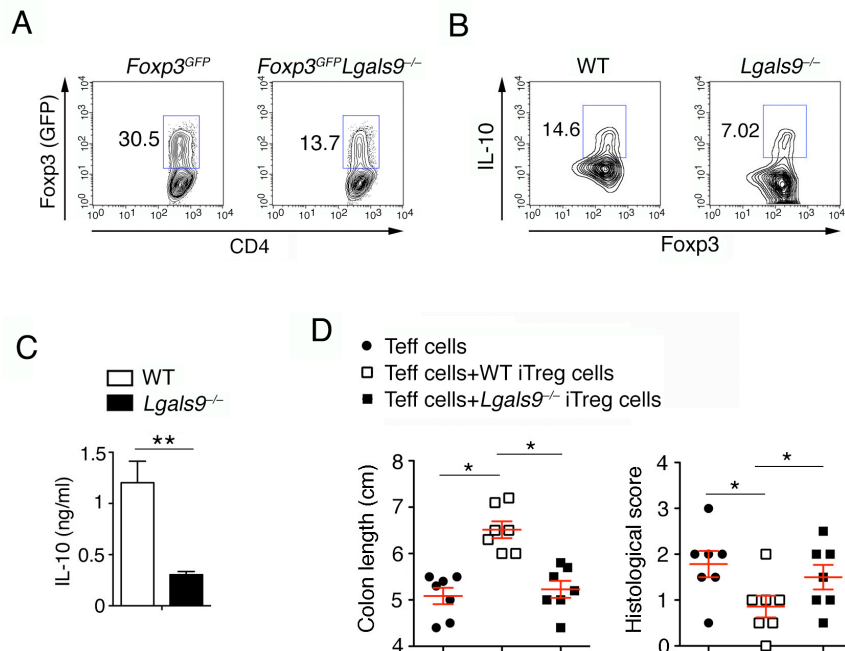

**Figure S3, related to Figure 3.** (A) Naïve  $Foxp3^{GFP}$  or  $Foxp3^{GFP}Lgals9^{-/-}$  T cells were differentiated into iTreg cells with TGF- $\beta$ . The frequency of GFP ( $Foxp3^+$ ) cells was determined by flow cytometry; (B) Intracellular staining of IL-10 production by differentiated WT and  $Lgals9^{-/-}$   $CD4^+Foxp3^+$  iTreg cells was determined by flow cytometry; (C) WT and  $Lgals9^{-/-}$  iTreg cells were stimulated for 24 h with PMA and ionomycin, and IL-10 production in the supernatant was determined by ELISA; (D) Left: Colon lengths of  $Rag2^{-/-}Lgals9^{-/-}$  mice which had received the indicated cells for transfer as in **Figure 3C**, measured from the colocecal junction to the anal verge; Right: Quantification of pathological changes in the colon of mice as in **Figure 3C**; The data are representative of three independent experiments (A, B, D) or are pooled of three independent experiments (C) with  $n \geq 4$  mice each group.  $*P < 0.05$ ,  $**P < 0.01$  (Student's  $t$ -test, error bars, SD).

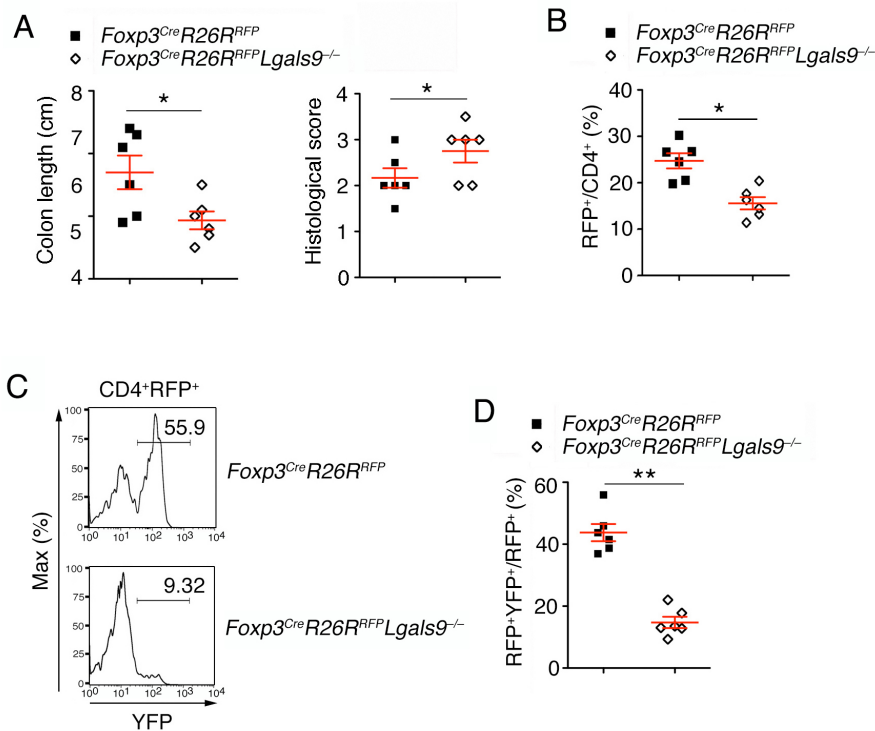

**Figure S4, related to Figure 4.** (A) Left: Colon lengths of *Rag2<sup>-/-</sup>Lgals9<sup>-/-</sup>* mice which had received the indicated cells for transfer as in **Figure 4C**, measured from the colocecal junction to the anal verge; Right: Quantification of pathological changes in the colon of mice as in **Figure 4C** 10 weeks after colitis induction; (B) Quantification of the frequency of RFP<sup>+</sup> among CD4<sup>+</sup> T cells in the LP of WT and *Lgals9<sup>-/-</sup>* fate mapping mice; YFP expression within CD4<sup>+</sup>RFP<sup>+</sup> T cells isolated from LP of indicated mice as in **Figure 4C** was determined by (C) flow cytometry and (D) quantification. Data are representative of two independent experiments with  $n \geq 5$  mice each group. \* $P < 0.05$  (Student's *t*-test, error bars, SD).

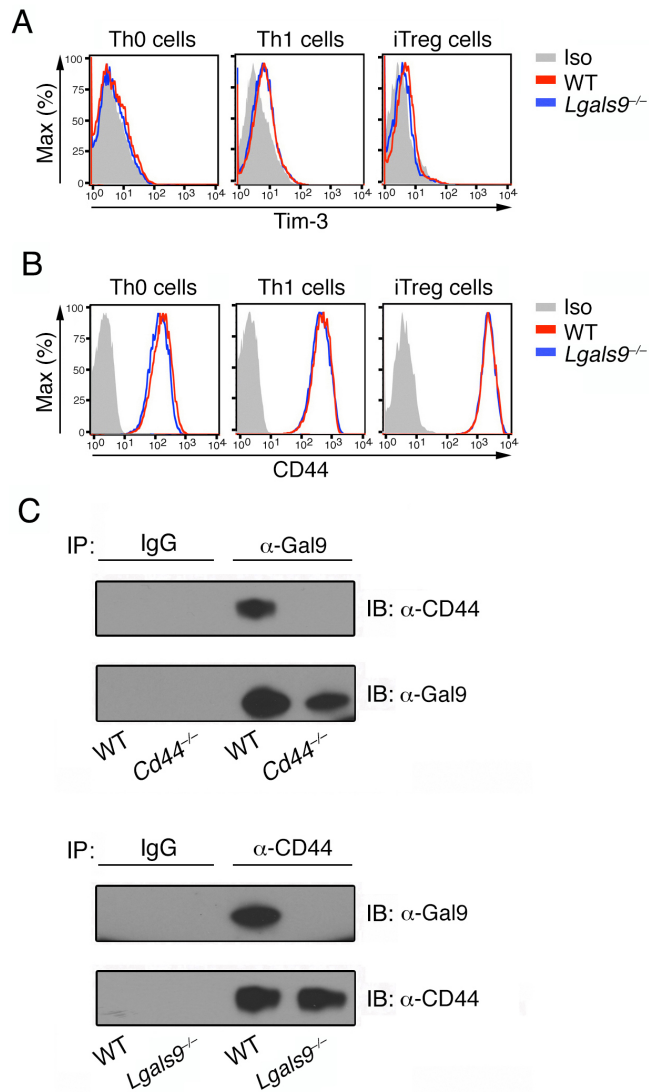

**Figure S5, related to Figure 5.** Flow cytometry of protein expression levels of (A) Tim3 and (B) CD44 on indicated T cell subsets; (C) Immunoprecipitation (with control IgG, anti-galectin-9 or anti-CD44) of lysates of WT and *Cd44*<sup>-/-</sup> or *Lgals9*<sup>-/-</sup> iTreg cells, followed by immunoblot analysis with the indicated antibodies. Data are representative of three independent experiments with  $n \geq 3$  mice each group.

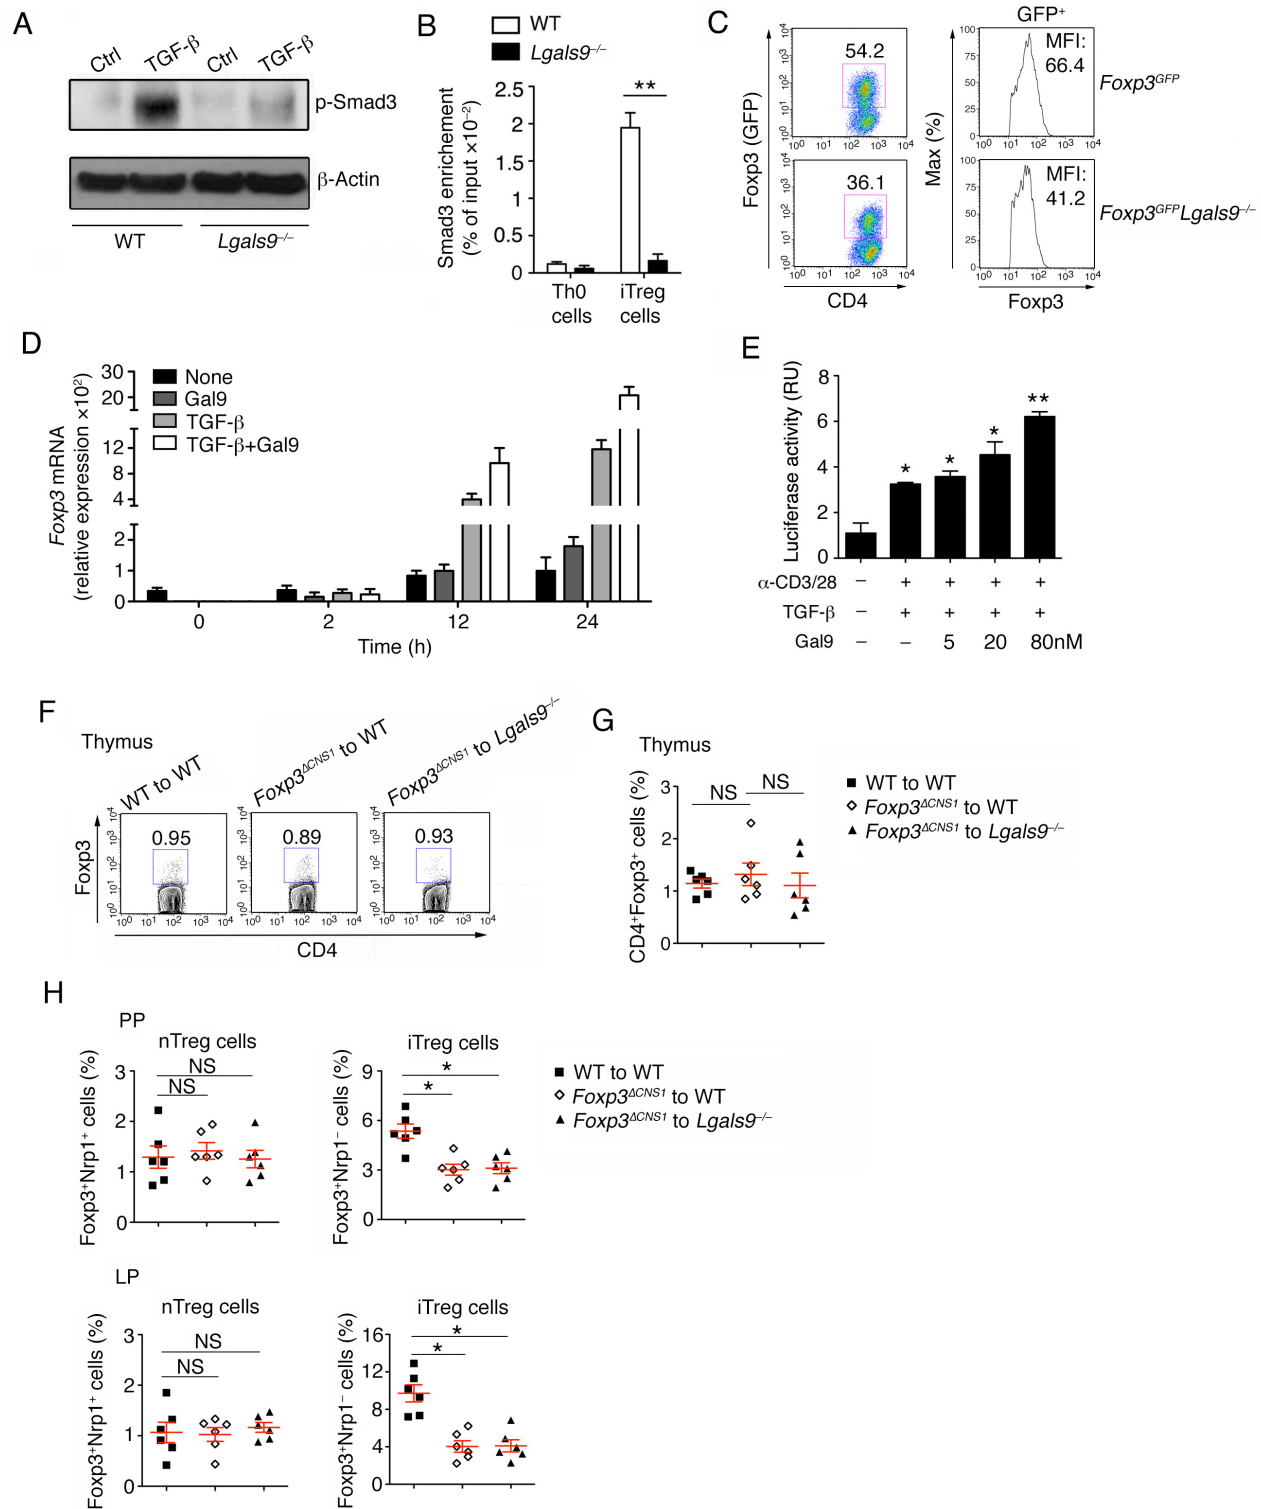

**Figure S6, related to Figure 6.** (A) The level of phosphorylated Smad3 was assessed in WT and *Lgals9*<sup>-/-</sup> iReg cells by immunoblot; (B) The binding of Smad3 to the *Foxp3*



CNS1 region in WT and *Lgals9*<sup>-/-</sup> iTreg cells was determined by ChIP-PCR; (C) Foxp3 expression frequency and mean fluorescence intensity (MFI) from *Foxp3*<sup>GFP</sup> and *Foxp3*<sup>GFP</sup>*Lgals9*<sup>-/-</sup> iTreg cells; (D) Activated naïve CD4<sup>+</sup> T cells were stimulated with TGF- $\beta$  and/or recombinant galectin-9 for 2, 12 and 24 hours. *Foxp3* mRNA expression was assessed by quantitative real-time PCR analysis; (E) EL4 LAF cells were transfected with a Foxp3 promoter reporter construct containing the CNS1 enhancer and stimulated with anti-CD3 and anti-CD28 antibodies and TGF- $\beta$  in the presence of increasing concentrations of galectin-9. Luciferase activity was measured 48 hours later; Chimeric mice were generated by transferring WT or *Foxp3* <sup>$\Delta$ CNS1</sup> BM into WT or *Lgals9*<sup>-/-</sup> host mice. 10 weeks after reconstitution, the frequency of Foxp3<sup>+</sup> Treg cells in thymus was determined by (F) flow cytometry and (G) quantification; (H) Quantification of the frequency of Foxp3<sup>+</sup>Nrp1<sup>lo</sup> iTreg cells or Foxp3<sup>+</sup>Nrp1<sup>hi</sup> nTreg cells in PP and LP as in **Figure 6E**. Data are representative of three independent experiments (A, C-D, F-H) or are pooled of three independent experiments (B, E) with n  $\geq$  4 mice each group. \**P* < 0.05, \*\**P* < 0.01 (Student's *t*-test, error bars, SD).

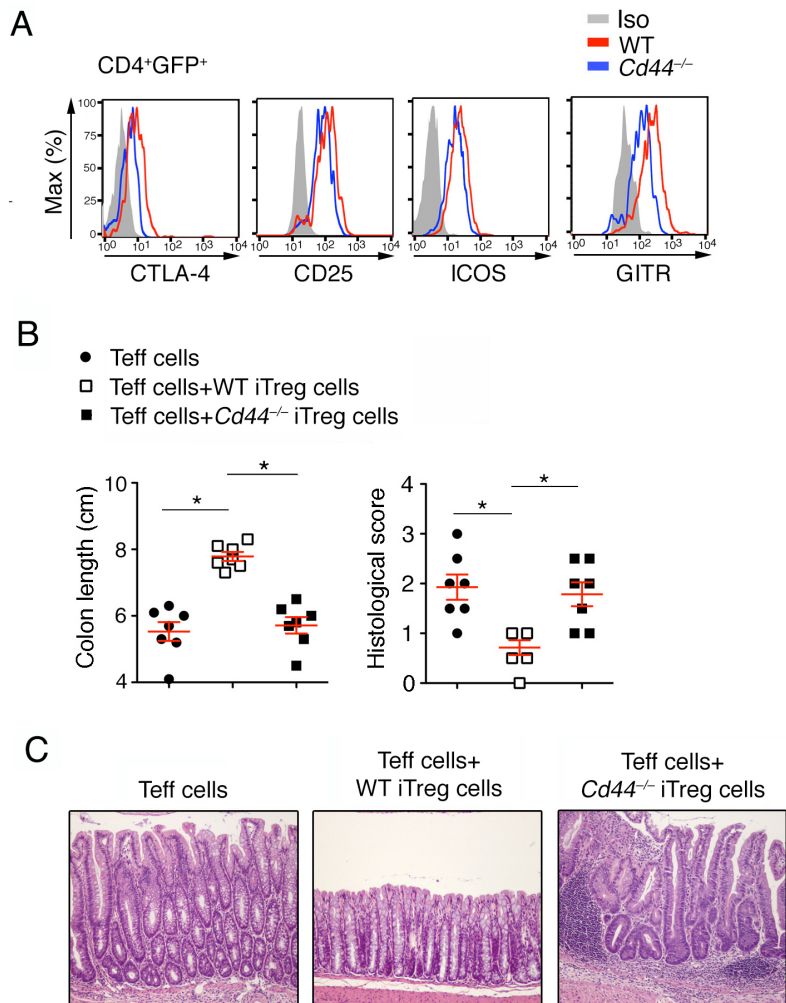

**Figure S7, related to Figure 7.** (A) The expression of indicated co-stimulatory molecules on *Foxp3*<sup>GFP</sup> or *Foxp3*<sup>GFP</sup>*Cd44*<sup>-/-</sup> CD4<sup>+</sup>GFP<sup>+</sup> iTreg cells was determined by flow cytometry; (B) Left: Colon lengths of *Rag2*<sup>-/-</sup> mice which had received the indicated cells for transfer as in **Figure 7E**, measured from the colocecum junction to the anal verge; Right: Quantification of pathological changes in the colon of mice as in **Figure 7E**; (c) Hematoxylin and eosin staining of colon samples from the different groups as in **Figure 7E** 10 weeks after colitis induction (original magnification,  $\times 20$ ).

The data are representative of three independent experiments with  $n \geq 5$  mice each group.

\* $P < 0.05$ , (Student's  $t$ -test, error bars, SD).
